# Supplementary material for: Natural Cyclopeptide RA-XII, a New Autophagy Inhibitor, Suppresses Protective Autophagy for Enhancing Apoptosis through AMPK/mTOR/P70S6K Pathways in HepG2 Cells
Source: MDPI journal article supplement (doi:10.3390/molecules22111934), 2017-11-11
Supplement: s1 [file s1]

Article

# Natural cyclopeptide RA-XII, a new autophagy inhibitor, suppresses protective autophagy for enhancing apoptosis through AMPK/mTOR/P70S6K pathways in HepG2 cells

Lihua Song<sup>1,†</sup>, Zhe Wang<sup>1,†</sup>, Yurong Wang<sup>1</sup>, Di Guo<sup>1</sup>, Jianhong Yang<sup>2</sup>, Lijuan Chen<sup>2</sup> and Ninghua Tan<sup>1,3,\*</sup>

<sup>1</sup> School of Traditional Chinese Pharmacy, China Pharmaceutical University, 639 Longmian Avenue, Nanjing 211198, China; songlihua4835@163.com(L.S.); wangzhe153807105@163.com(Z.W.); yurong1987213@163.com(Y.W.); guodi33@163.com(D.G.)

<sup>2</sup> State Key Laboratory of Biotherapy, Sichuan University, and Collaborative Innovation Center for Biotherapy, Chengdu 610041, China; yjh0742043024@hotmail.com(J.Y.); ljchen@scu.edu.cn(L.C.)

<sup>3</sup> State Key Laboratory of Phytochemistry and Plant Resources in West China, Kunming Institute of Botany, Chinese Academy of Sciences, Kunming 650201, China

\* Correspondence: nhtan@cpu.edu.cn; Tel.: +86-25-84155947

† These authors contributed equally to this work.

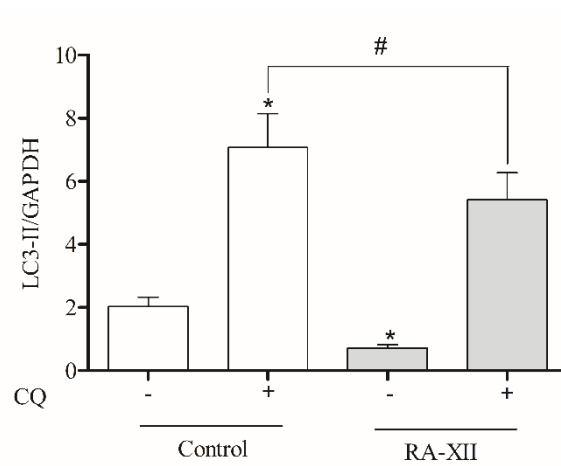

**Figure S1.** Statistical graph of Figure 3E. HepG2 cells were treated with or without RA-XII (5  $\mu$ M) in the presence or absence of CQ (25  $\mu$ M) for 48 h, and the marker of autophagy LC3-II were analyzed by Western blot. These bands were quantified by statistical graph. The data are presented as mean  $\pm$  SEM of three independent experiments. (\* $p$  < 0.05, vs Control, # $p$  < 0.05, vs indicated treatment.)
